# Supplementary material
Source: Elsevier journal article supplement (https://www.sciencedirect.com/science/article/pii/S1885585720301122)

*Rev Esp Cardiol. Impact of renin-angiotensin system inhibitors on outcomes after surgical or transcatheter aortic valve replacement. A meta-analysis*

**SUPPLEMENTARY DATA**

**REFERENCES**

1. Goel SS, Aksoy O, Gupta S, et al. Renin-angiotensin system blockade therapy after surgical aortic valve replacement for severe aortic stenosis: A cohort study. *Ann Intern Med*. 2014;161:699-710.
2. Inohara T, Manandhar P, Kosinski AS, et al. Association of Renin-Angiotensin Inhibitor Treatment With Mortality and Heart Failure Readmission in Patients With Transcatheter Aortic Valve Replacement. *JAMA*. 2018;320:2231-2241.
3. Lassnigg A, Hiesmayr M, Frantal S, et al. Long-term absolute and relative survival after aortic valve replacement: a prospective cohort study. *Eur J Anaesthesiol*. 2013;30:695-703.
4. 10. Magne J, Guinot B, Le Guyader A, et al. Relation Between Renin-Angiotensin System Blockers and Survival Following Isolated Aortic Valve Replacement for Aortic Stenosis. *Am J Cardiol*. 2018;121:455-460.
5. Ochiai T, Saito S, Yamanaka F, et al. Renin-angiotensin system blockade therapy after transcatheter aortic valve implantation. *Heart*. 2018;104:644-651.
6. Rodríguez-Gabella T, Catalá P, Muñoz-García AJ, et al. Renin-Angiotensin system inhibition following transcatheter aortic valve replacement. *J Am Coll Cardiol*. 2019;74:631-641.

FIGURE LEGENDS

**Figure 1 of the supplementary data.** Funnel plot and linear regression of funnel plot to show lack of asymmetry.

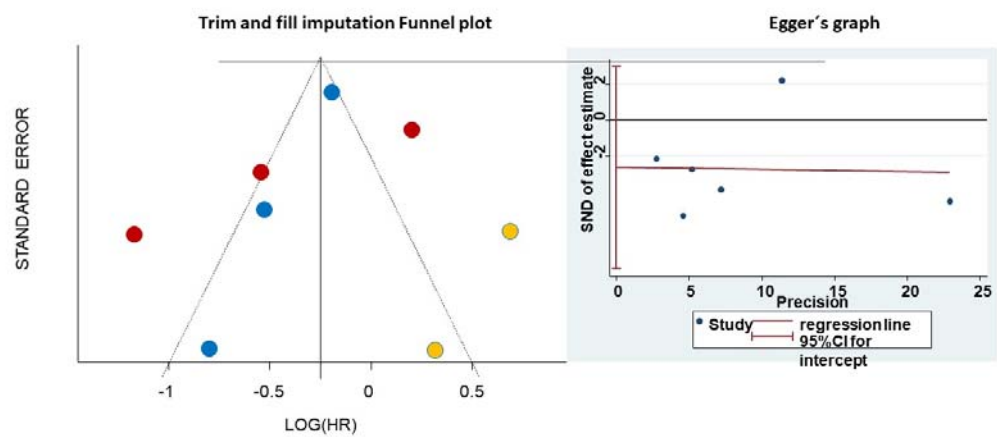

**Figure 2 of the supplementary data.** Summary of the review protocol and assessment of risk of bias. SND, standard normal deviate.

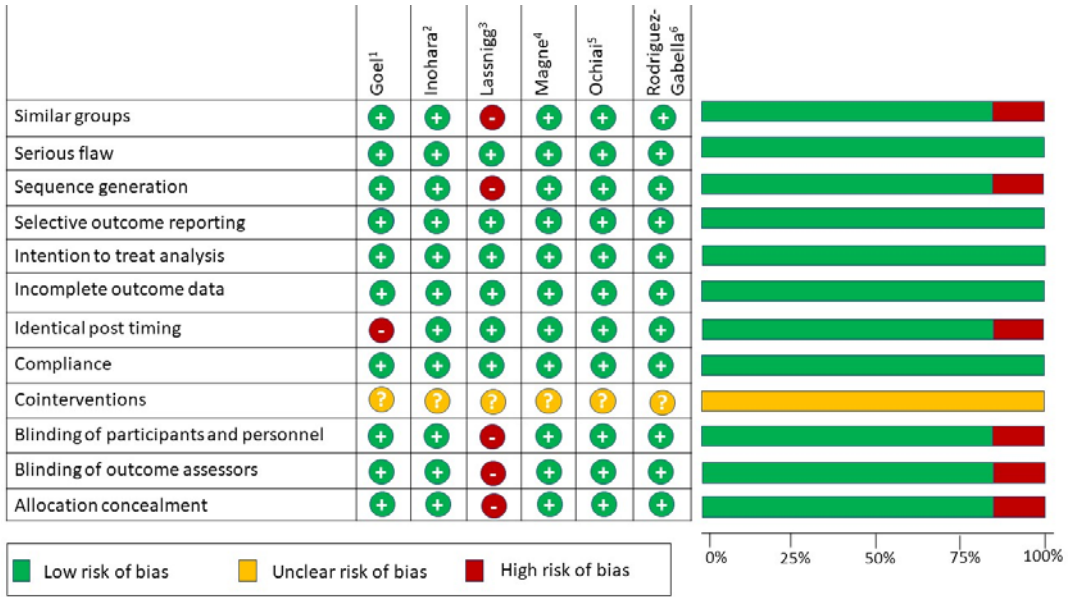

**Figure 3 of the supplementary data.** Metaregression analysis according to study design.

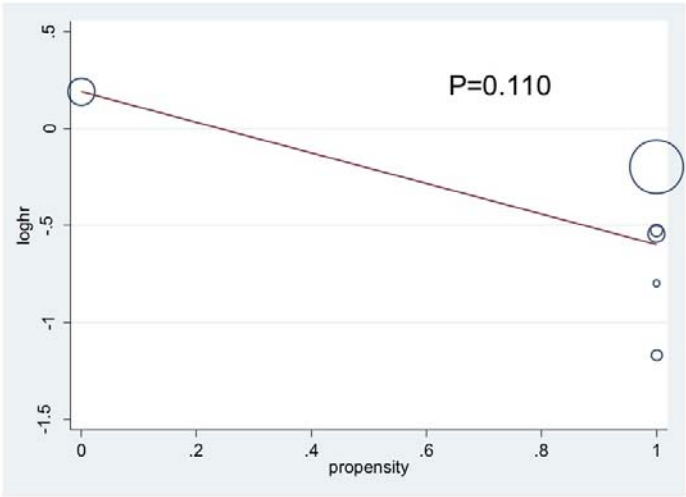

Supplement: mmc1 [file S1885585720301122:mmc1.pdf]
